# Supplementary material for: The retinoblastoma homolog RBR1 mediates localization of the repair protein RAD51 to DNA lesions in Arabidopsis
Source: PubMed Central journal article supplement — EMBO J. 2017 Mar 20;36(9):1279–97. doi: 10.15252/embj.201694571 (PMC5412766; doi:10.15252/embj.201694571), 2017-03-20

## **Appendix to Biedermann et al.**

### **Appendix table of content**

#### **Appendix Tables**

**Appendix Table S1 – Significance table for Fig. 4I**

**Appendix Table S2 – Primer sequences**

#### **Appendix Figure Legends**

**Appendix Figure Legend S1 – The *rbr1* mutant line is hypersensitive to BLM and cisplatin.**

**Appendix Figure Legend S2 – Cell death in root tips upon drug treatment.**

**Appendix Figure Legend S3 – Co-localization of RBR1 and RAD51 to  $\gamma$ H2AX foci.**

#### **Appendix Figures**

**Appendix Figure S1 – The *rbr1* mutant line is hypersensitive to BLM and cisplatin.**

**Appendix Figure S2 – Cell death in root tips upon drug treatment.**

**Appendix Figure S3 – Co-localization of RBR1 and RAD51 to  $\gamma$ H2AX foci.**

## Appendix Tables

**Appendix Table S1 – Significance table for Fig. 4I**

|            | WT -B -R | WT +B -R | WT -B +R | WT +B +R | rbr1 -B -R | rbr1 +B -R | rbr1 -B +R | rbr1 +B +R |
|------------|----------|----------|----------|----------|------------|------------|------------|------------|
| WT -B -R   |          | *        | -        | *        | -          | **         | -          | **         |
| WT +B -R   |          |          | *        | -        | -          | *          | -          | *          |
| WT -B +R   |          |          |          | *        | -          | ***        | -          | ***        |
| WT +B +R   |          |          |          |          | *          | -          | *          | -          |
| rbr1 -B -R |          |          |          |          |            | **         | -          | **         |
| rbr1 +B -R |          |          |          |          |            |            | **         | -          |
| rbr1 -B +R |          |          |          |          |            |            |            | **         |
| rbr1 +B +R |          |          |          |          |            |            |            |            |

- No significant differences

\* P value < 0.05

\*\* P value < 0.01

\*\*\* P value < 0.001

**Appendix Table S2 – Primer sequences**

### Genotyping

| Wildtype      | Designation | Sequence                  |
|---------------|-------------|---------------------------|
| <i>CDKA;1</i> | A03         | CAGATCTCTTCTGGTTATTCACA   |
|               | A04         | TGTACAAGCGAATAAAGACATTTGA |
| <i>E2FA</i>   | E2Fa FW     | ATGTCCGGTGTCTGACGATCTTC   |
|               | E2Fa RW     | TCATCTCGGGGTTGAGTCAAC     |
| <i>KU70</i>   | A17         | AACCCTTACTTAGATATGATTTAC  |
|               | A18         | AGGGTGTATTCCGAGGCTTACT    |
| <i>RAD51</i>  | A302        | GGTCCATCACAGAGTTATATGG    |

|                               |                    |                                |
|-------------------------------|--------------------|--------------------------------|
|                               | A303               | AGCCATGATATCCCACCAATC          |
| <i>RBR1</i>                   | M206               | CTTCCACAGCCCGGTCGTTTC          |
|                               | M207               | GATTACCGCAGCATTCTAGTTGAACGC    |
| <i>WEE1</i>                   | A06                | TCAATAAGGCTTGGTTTCTTCAGT       |
|                               | A07                | AGGCATGTAACGTGCATCTC           |
| <b>T-DNA insertion allele</b> | <b>Designation</b> | <b>Sequence</b>                |
| <i>cdka;1</i>                 | A01                | GCGTGGACCGCTTGCTGCAACTCTCTCAGG |
|                               | A02                | CCAGATTCTCCGTGGAATTGCG         |
| <i>e2fa-2</i>                 | GABI-Kat LB        | ATATTGACCATCATACTCATTGC        |
|                               | E2Fa RW            | TCATCTCGGGGTTGAGTCAAC          |
| <i>ku70</i>                   | A18                | AGGGTGTATTCCGAGGCTTACT         |
|                               | LBd1               | TCGGAACCACCATCAAACAG           |
| <i>rad51-1</i>                | A302               | GGTCCATCACAGAGTTATATGG         |
|                               | GABI-Kat LB        | ATATTGACCATCATACTCATTGC        |
| <i>rbr1-2</i>                 | M206               | CTTCCACAGCCCGGTCGTTTC          |
|                               | J504               | GCGTGGACCGCTTGCTGCAACTCTCTCAGG |
| <i>wee1-1</i>                 | A05                | CCCATTGGACGTGAATGTAGACAC       |
|                               | A06                | TCAATAAGGCTTGGTTTCTTCAGT       |

### qPCR

| Target       | Forward primer           | Reverse primer          |
|--------------|--------------------------|-------------------------|
| <i>AHP2</i>  | GCGCAAGCGTAAGAGGATGTTC   | CCAAGCTCCTCTTTAGTTCCTC  |
| <i>ATM</i>   | TTGGTCTTGGTGACCGACATGC   | TCTTGTCAGTCTGAACGGAACCC |
| <i>ATR</i>   | GTGCCATTGAGATTGACCCAGAAC | TGCCCTCATATCCAGTGATGCC  |
| <i>BRCA1</i> | TGCATCCATTAAGTTGCCCTGTG  | TAGGCTGAGAGTGCAAGTGGTTC |

|              |                          |                          |
|--------------|--------------------------|--------------------------|
| <i>FAN1</i>  | AGTGAAGGACGCAAATGAACTCG  | TGAGGTGCGACTGAACACCTTG   |
| <i>KU70</i>  | AGCAGTCGATTTATGGCGATGACC | CCACAGTCAAGTCCTTCAGCTTTC |
| <i>LIG4</i>  | TTGGCTTCAAGTGAGAACAGAGC  | TGACCCACTTCATCTCCTGAGC   |
| <i>MLH1</i>  | ACGACGGTCACGGTATTAGACG   | AGCTTCGATGTTGTATGTCTCTCG |
| <i>MRE11</i> | AACAAATCTCAGCCTCGGGTTAC  | AGAAGTTGTTCCGCTTGAGAGGTC |
| <i>MSH4</i>  | TGAGAACAGAGCCAAAGAGGTTGG | AGATGCAGTGAAGCCGATCTTAGG |
| <i>MSH5</i>  | ACGAGAGCTGCTTGCCTGTTTC   | TCTGTGTCTGGCCTAAGAACGC   |
| <i>MUS81</i> | TTGCCATTGAGCTAATGCAGGTC  | TCTTCTTGCGCCGAGACATCTG   |
| <i>NBS1</i>  | CTTCACTGATACCACCATCCGTTG | GCTTCAGAATCCGCTACCACTG   |
| <i>PARP2</i> | ATGCTACTCTGGCACGGTTCAC   | AGGAGGAGCTATTGCGAGACCTTG |
| <i>PCNA1</i> | CGGTGACATTGGAACCGCTAAC   | TCACAATTGCATCTTCCGGCTTG  |
| <i>RAD51</i> | TTCCGCTCTGGAAAGACTCAGC   | ACCTCCTTGATCCATGGGAAGTTG |
| <i>RECQ2</i> | ATGCTTCGTGGTGGGACAACTC   | GCAGCCAAACCCATAACCTGATCC |
| <i>SOG1</i>  | CCATGAGGTTTCTCTTGCCGAGAC | TCAGGCCCAGAAGTTGGTCTTTC  |
| <i>TSO2</i>  | TTTCGCTTGCCTCGAAGGTATC   | AGGCATGAGTCTCGTTTCTTCAG  |

| <b>Reference genes</b> | <b>Forward primer</b>   | <b>Reverse primer</b>    |
|------------------------|-------------------------|--------------------------|
| At1g02410              | ATCTGGTACCGTCACTGAAAGGG | TGCATCCCATCTGCAACATCAGC  |
| At4g26410              | TCGTCTTGCTAAGTCCGTCCAC  | GCCGAAGTCCGTCCATCAAATCAG |
| At4g30520              | TTCCAGCAAGGACTTTCAACG   | CAGAACAAATCTCAGGTGGGTTGC |
| At5g36210              | AGAGCGGTTGTTAAGGCAGTGG  | TCTGCCTTGCCAGAAGATACCAAG |

## ChIP

| <b>Designation</b> | <b>Sequence</b>      |
|--------------------|----------------------|
| RAD51_+1209_F      | ATGCTGAGGGAACATTCAGG |
| RAD51_+1330_R      | TCCAAACCTGCATCATTTCA |
| RAD51_+228_F       | CGCGATGTGAAATAGGTGTG |
| RAD51_+323_R       | ACCCCAAAAAGTGTGATT   |

|                   |                           |
|-------------------|---------------------------|
| RAD51_-558_F      | TGTTGGAATTGTGGTGGTTC      |
| RAD51_-489_R      | TTTGACCGCCGAGTGATAC       |
| RAD51_-1063_F     | GGGTCCATAGCTCAGTGATAGAG   |
| RAD51_-1002_R     | GAAAACATATAGGGCCAACC      |
| RAD51_E2F(-113)_F | GTTGTGGCGCTTCTTTCAAT      |
| RAD51_E2F(-17)_R  | GATTCGGGTCACCAGAGAAA      |
| ACT7(At5g09810)_F | GTTGCCATTGAGCCGTTCTTTC    |
| ACT7(At5g09810)_R | CAGAATCGAGCACAAATACCGGTTG |
| MCM_F4            | TCCCGCCAAAACACTCATAGTC    |
| MCM_R4            | TGACATCGTTGCTTCGTCTC      |
| ORC3_F            | CCAATTCCGGTCTAGTCTGG      |
| ORC3_R            | TGGAGCAATCGAAAACGACG      |

## Appendix Figure Legends

### Appendix Figure S1 – The *rbr1* mutant line is hypersensitive to BLM and cisplatin.

- **A** Root tip phenotypes of eight day-old seedlings germinated and grown on medium containing no supplement and transferred to medium containing BLM (6µg/ml) for two days.
- **B** Comparison of root growth of wild-type and *rbr1* plants on cisplatin (cisPt). Plants were germinated on MS medium containing no supplement and transferred to medium with 15µM cisPt three days after germination. Daily root growth was measured one, two and three days after transfer (dat). Error bars signify the standard deviation in three independent experiments. Two asterisks indicate significance higher than 99% as calculated by Student's T test.
- **C** Root tip phenotypes of eight day-old seedlings germinated and grown on medium containing no supplement and transferred to medium containing cisPt (15µM) for one or two days respectively.

### Appendix Figure S2 – Cell death in root tips upon drug treatment.

- Root tip phenotypes of ten day-old seedlings germinated and grown on medium containing HU (1mM) or no supplement (-). Upper rows show cell death visualized by propidium iodide staining, lower rows show brightfield microscopic images of root tips. Scale bars: 50µm.

### Appendix Figure S3 – Co-localization of RBR1 and RAD51 to γH2AX foci.

- Z-stack image of co-localization of RBR1 (green) and RAD51 (red) to γH2AX foci (grey) in immuno-stained spreads of BLM-treated root tips of *PRO<sub>RBR1</sub>mCherry:RBR1 rbr1-3* plants, counter-stained with DAPI (DNA, blue).

# Appendix Figure S1

A

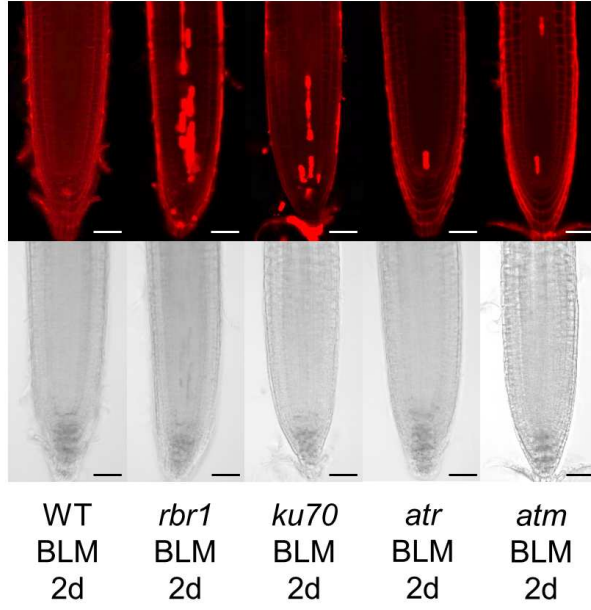

B

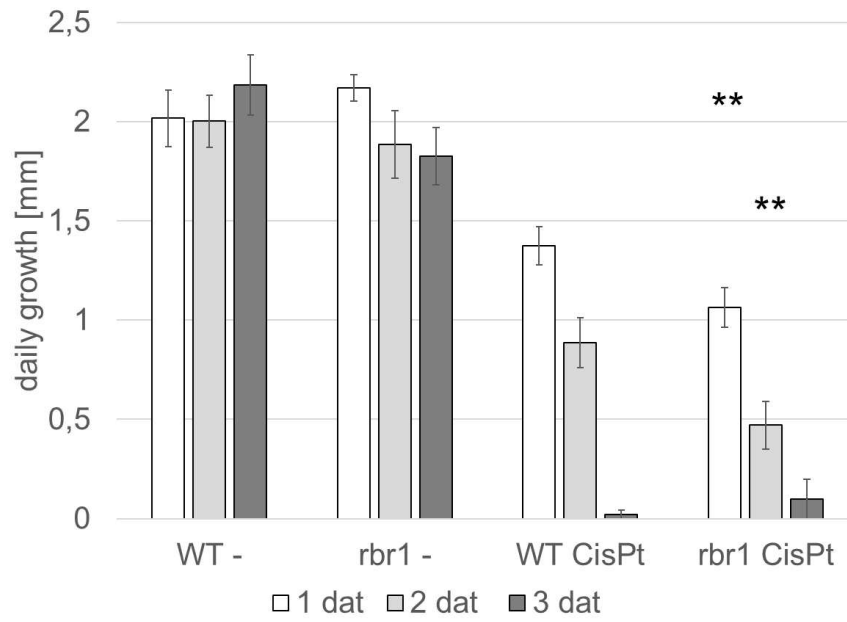

C

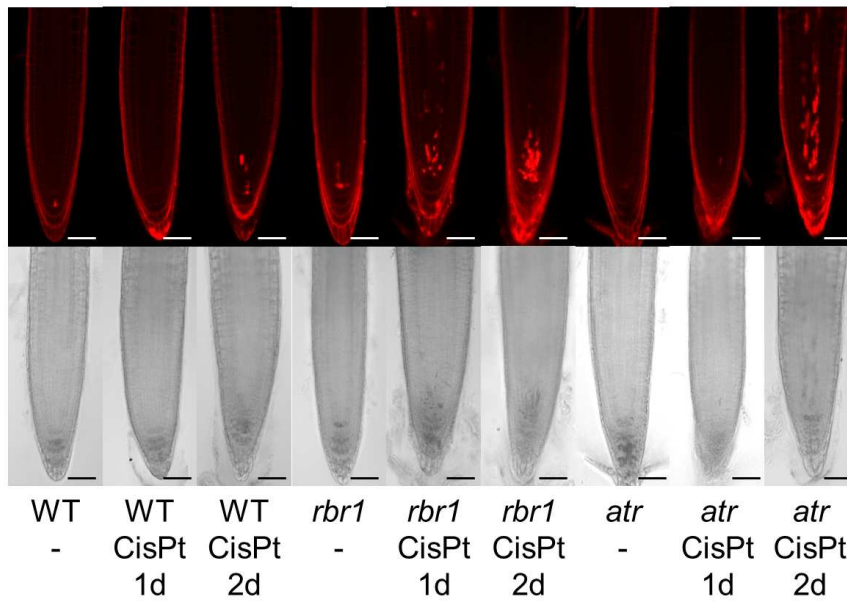

## Appendix Figure S2

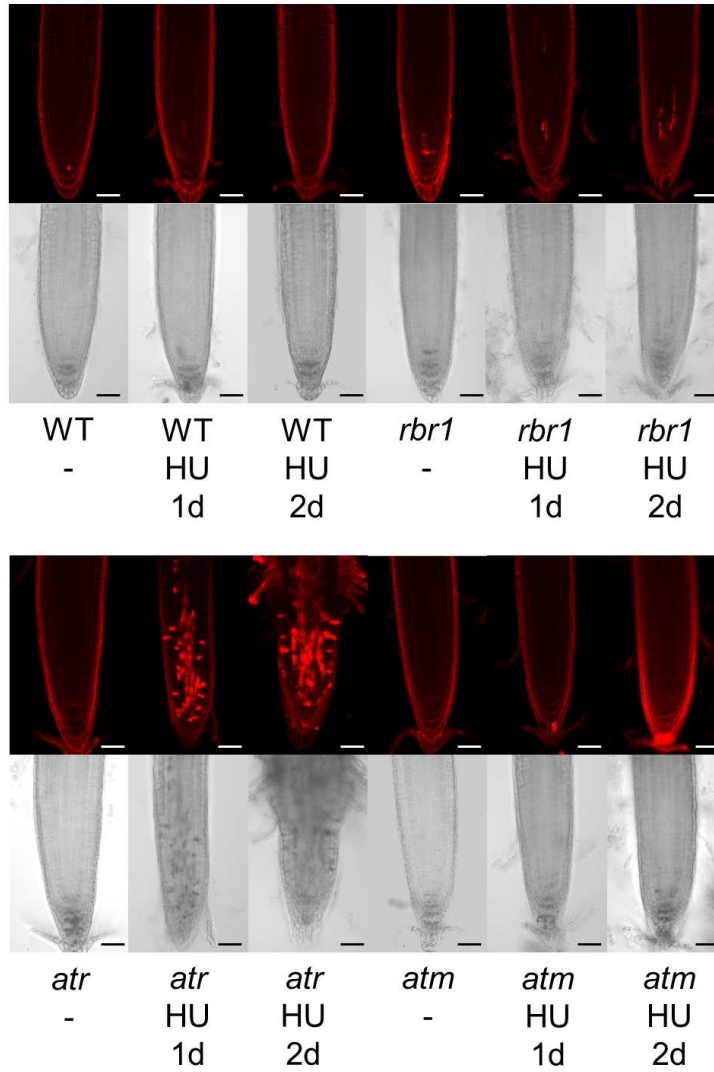



Appendix Figure S3

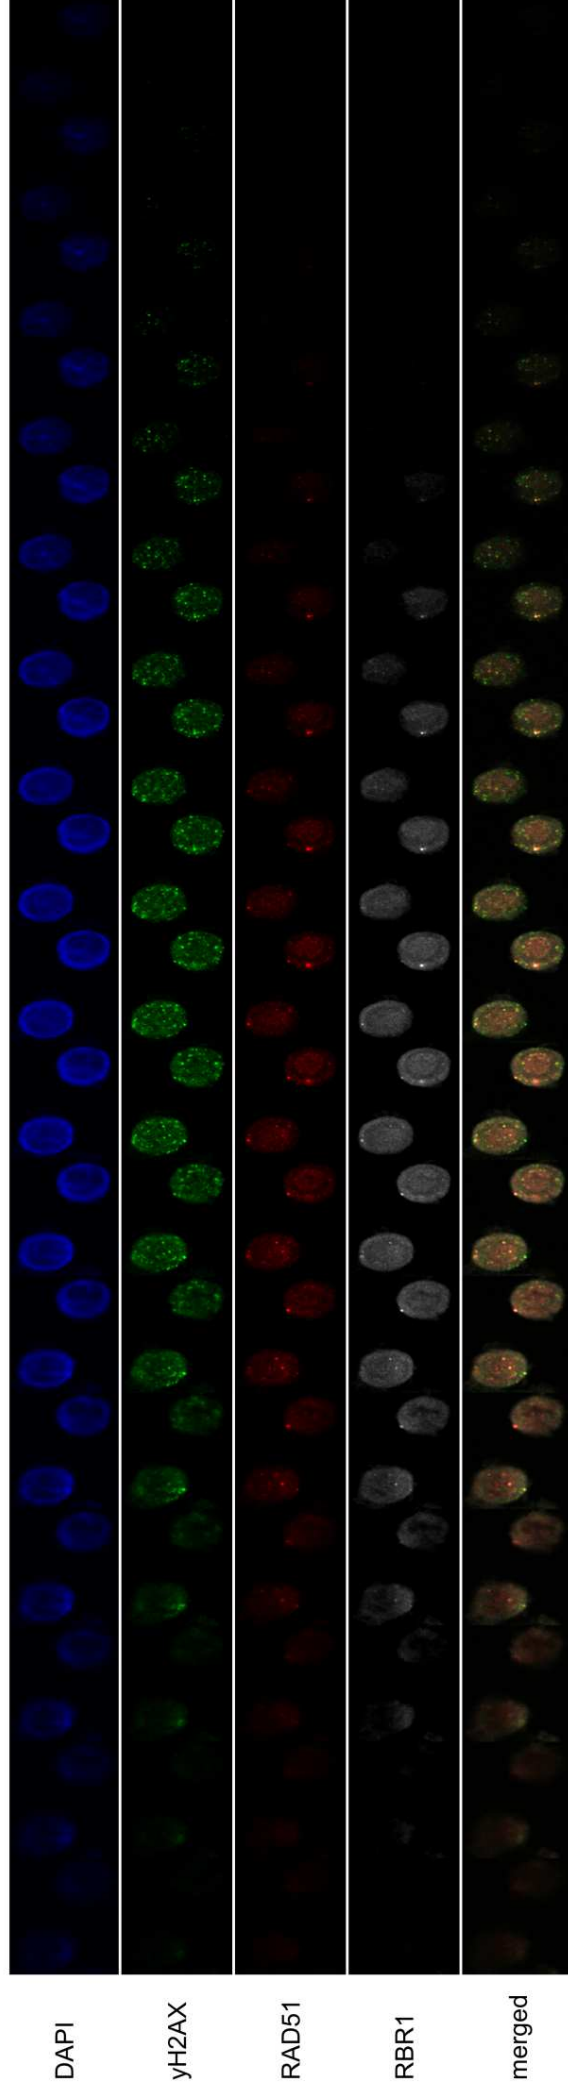

Supplement: EMBJ-36-1279-s001.pdf [file EMBJ-36-1279-s001.pdf]
