# Supplementary material for: The retinoblastoma homolog RBR1 mediates localization of the repair protein RAD51 to DNA lesions in Arabidopsis
Source: PubMed Central journal article supplement — EMBO J. 2017 Mar 20;36(9):1279–97. doi: 10.15252/embj.201694571 (PMC5412766; doi:10.15252/embj.201694571), 2017-03-20
Supplement: EMBJ-36-1279-s002.pdf [file EMBJ-36-1279-s002.pdf]

## Expanded View Figures

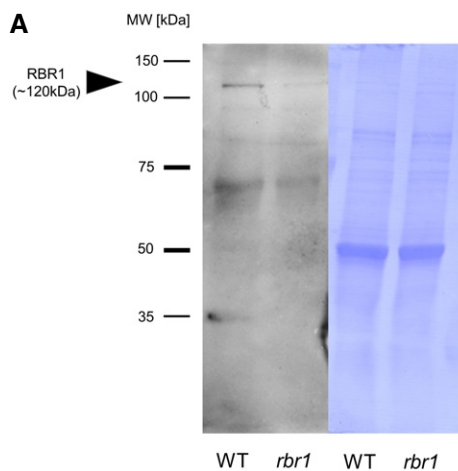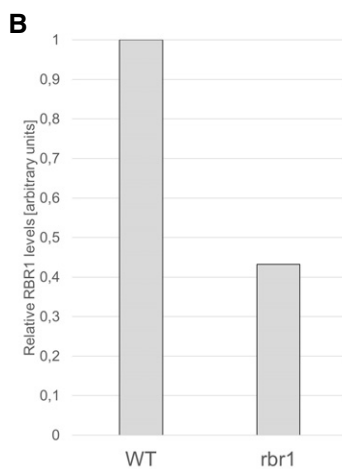

**Figure EV1. *rbr1-2* is a temperature-dependent mutant.**

A Western blot of RBR1 protein in WT and *rbr1* plants at the restrictive temperature of 17°C.  
 B Relative quantification of the signal intensity of the RBR1 bands (gray mean values measured by ImageJ) in (A).

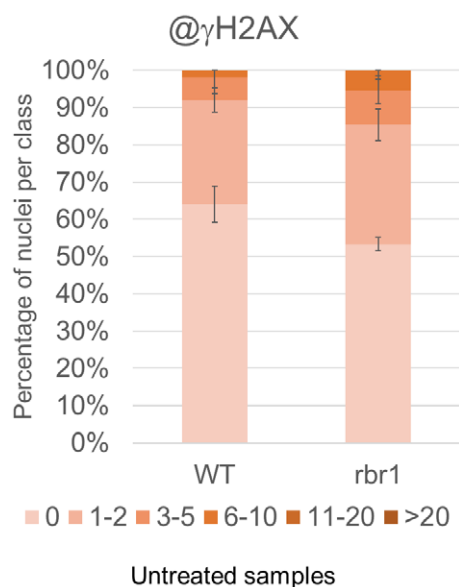

**Figure EV2. Quantification of  $\gamma$ H2AX foci in untreated WT and *rbr1* plants.**

A Fifty nuclei per line per experiment were filed into six classes according to their counted number of  $\gamma$ H2AX foci: nuclei containing no  $\gamma$ H2AX foci, 1–2, 3–5, 6–10, 11–20, or more than 20  $\gamma$ H2AX foci, respectively. Three independent experiments were analyzed. Error bars indicate the standard deviation.

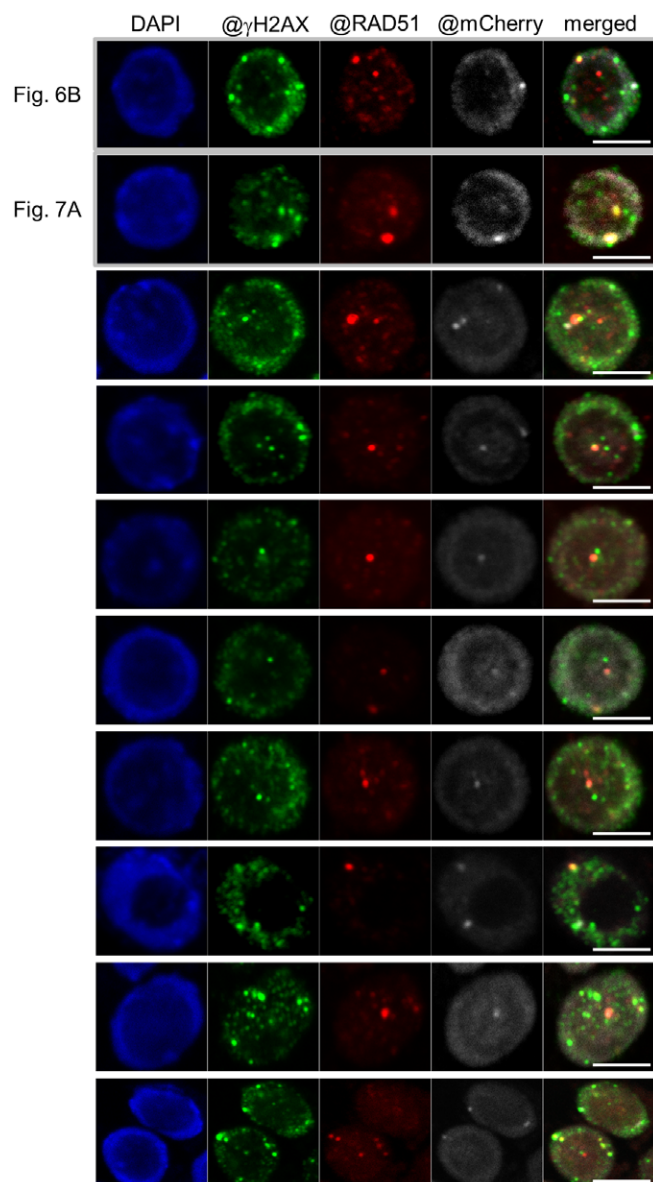

**Figure EV3. Co-localization of RBR1 and RAD51 to  $\gamma$ H2AX foci.**

Co-localization of  $\gamma$ H2AX (green) and RAD51 (red) to RBR1 foci (gray) in immunostained spreads of BLM-treated root tips of *PRO<sub>RBR1</sub>mCherry:RBR1 rbr1-3* plants, counterstained with DAPI (DNA, blue). Note that the examples shown in Figs 6 and 7 were also added to this figure (the first two rows) for better comparison. Scale bars: 5  $\mu$ m.

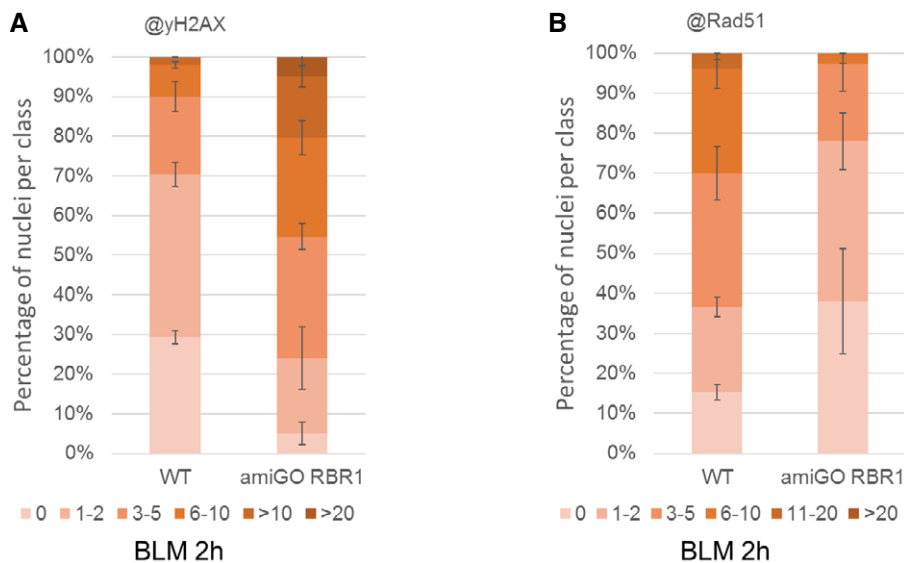

**Figure EV4. Distribution of  $\gamma$ H2AX and RAD51 foci in *amiGO RBR1* line.**

**A** Quantification of  $\gamma$ H2AX foci in WT and *amiGO RBR1* plants after BLM treatment. Fifty nuclei per line per experiment were filed into six classes according to their counted number of  $\gamma$ H2AX foci: nuclei containing no  $\gamma$ H2AX foci, 1–2, 3–5, 6–10, 11–20, or more than 20  $\gamma$ H2AX foci, respectively. Three independent experiments were analyzed. Error bars indicate the standard deviation.

**B** Quantification of RAD51 foci in WT and *amiGO RBR1* plants after BLM treatment. Fifty nuclei per line per experiment were filed into six classes according to their counted number of RAD51 foci: nuclei containing no RAD51 foci, 1–2, 3–5, 6–10, 11–20, or more than 20 RAD51 foci, respectively. Three independent experiments were analyzed. Error bars indicate the standard deviation.

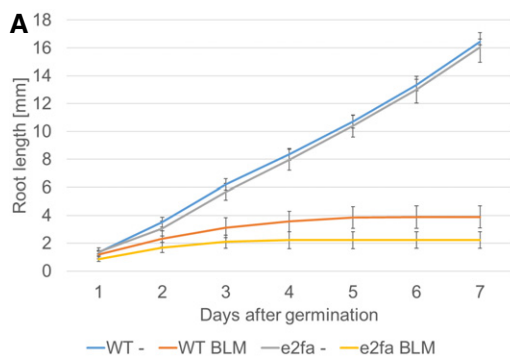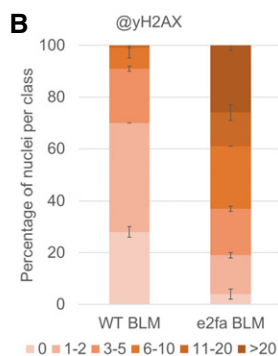

**Figure EV5. *e2fa* mutant is hypersensitive against BLM.**

**A** Comparison of root growth of wild-type and *e2fa* plants germinated and grown on medium containing 6  $\mu$ g/ml BLM or no supplement (-). Error bars signify the standard deviation in three independent experiments.

**B** Quantification of  $\gamma$ H2AX foci in WT and *e2fa* plants after BLM treatment. One hundred nuclei per line per experiment were filed into six classes according to their counted number of  $\gamma$ H2AX foci: nuclei containing no  $\gamma$ H2AX foci, 1–2, 3–5, 6–10, 11–20, or more than 20  $\gamma$ H2AX foci, respectively. Three independent experiments were analyzed. Error bars indicate the standard deviation.
